# Supplementary material
Source: PubMed Central journal article supplement (PMC2901726)
Supplement: supp_76_14_4664__1.pdf [file supp_76_14_4664__1.pdf]

M P Q F G I L C K T P P K V L V R Q F V E R F E  
ATG CCC CAG TTC GGT ATC CTC TGC AAG ACC CCC CCT AAG GTC CTC GTC CGT CAG TTC GTC GAG CGC TTC GAG  
R P S G E K I A L C A A E L T Y L C W M I T H N  
CGC CCT TCC GGT GAG AAG ATT GCC CTC TGC GCC GCC GAA CTC ACC TAT CTC TGC TGG ATG ATC ACC CAC AAC  
G T A I K R A T F M S Y N T I I S N S L S F D I  
GGC ACC GCC ATC AAG CGT GCC ACC TTC ATG TCC TAC AAC ACC ATC ATT TCC AAC TCC CTC TCC TTC GAC ATC  
V N K S L Q F K Y K T Q K A T I L E A S L K K L  
GTC AAT AAG TCC CTC CAG TTC AAG TAC AAG ACC CAA AAG GCC ACC ATT CTC GAG GCC TCC CTC AAG AAA CTC  
I P A W E F T I I P Y Y G Q K H Q S D I T D I V  
ATC CCT GCC TGG GAG TTC ACC ATC ATT CCT TAC TAC GGC CAG AAG CAT CAG TCC GAC ATC ACC GAC ATC GTC  
S S L Q L Q F E S S E E A D K G N S H S K K M L  
TCC TCC CTC CAA CTC CAG TTC GAG TCC TCC GAA GAG GCC GAC AAG GGC AAT TCC CAC TCC AAG AAG ATG CTC  
K A L L S E G E S I W E I T E K I L N S F E Y T  
AAG GCC CTC CTC TCC GAG GGT GAG TCC ATC TGG GAG ATC ACC GAG AAG ATT CTC AAC TCC TTC GAG TAC ACC  
S R F T K T K T L Y Q F L A T F I N C G R I D  
TCC CGC TTC ACC AAA ACC AAG ACC CTC TAC CAA TTC CTC TTC CTC GCC ACC TTC ATC AAC TGC GGT CGC TTC  
S D I K N V D P K S F K L V Q N K Y L G V I I Q  
TCC GAC ATC AAG AAC GTC GAC CCT AAG TCC TTC AAG CTC GTC CAG AAC AAG TAC CTC GGC GTC ATT ATC CAG  
C L V T E T K T S V S R H I Y F F S A R G R I D  
TGC CTC GTC ACC GAG ACC AAG ACC TCC GTC TCC CGC CAC ATC TAC TTC TTC TCC GCC CGC GGT CGC ATC GAC  
P L V Y L D E F L R N S E P V L K R V N R T G N  
CCC CTC GTC TAT CTC GAC GAG TTC CTC CGT AAC TCC GAG CCC GTC CTC AAG CGC GTC AAC CGC ACC GGC AAC  
S S S N K Q E Y Q L L K D N L V R S Y N K A L K  
TCC TCC TCC AAT AAG CAG GAG TAC CAG CTC CTC AAA GAC AAC CTC GTC CGC TCC TAC AAC AAG GCC CTC AAG  
K N A P Y S I F A I K N G P K S H I G R H L M T  
AAG AAC GCC CCT TAC TCC ATC TTC GCC ATT AAG AAC GGC CCC AAG TCC CAC ATC GGT CGC CAC CTC ATG ACC  
S F L S M K G L T E L T N V V G N W S D K R A S  
TCC TTC CTC TCC ATG AAG GGC CTC ACC GAG CTC ACC AAC GTC GTC GGC AAT TGG TCC GAC AAG CGT GCC TCC  
A V A R T T Y T H Q I T A I P D H Y F A L V S R  
GCC GTC GCC CGC ACC ACC TAC ACC CAT CAG ATC ACC GCC ATC CCT GAC CAC TAC TTC GCC CTC GTC TCC CGC  
Y Y A Y D P I S K E M I A L K D E T N P I E E W  
TAC TAC GCC TAT GAC CCC ATT TCC AAG GAA ATG ATC GCC CTC AAG GAC GAG ACC AAT CCC ATC GAG GAG TGG  
Q H I E Q L K G S A E G S I R Y P A W N G I I S  
CAG CAC ATT GAG CAG CTC AAG GGT TCC GCC GAG GGC TCC ATC CGT TAC CCC GCC TGG AAC GGC ATT ATC TCC  
Q E V L D Y L S S Y I N R R I -  
CAG GAG GTC CTC GAC TAC CTC TCC TCC TAC ATC AAC CGC CGC ATC TAA

**Supplementary Fig. 1:** Sequence and predicted amino acid sequence of the codon-adapted *Pcflp* gene, encoding the yeast FLP recombinase. Substituted nucleotides are indicated underlined.
