# Supplementary material
Source: PubMed Central journal article supplement (PMC2901726)
Supplement: supp_76_14_4664__2.pdf [file supp_76_14_4664__2.pdf]

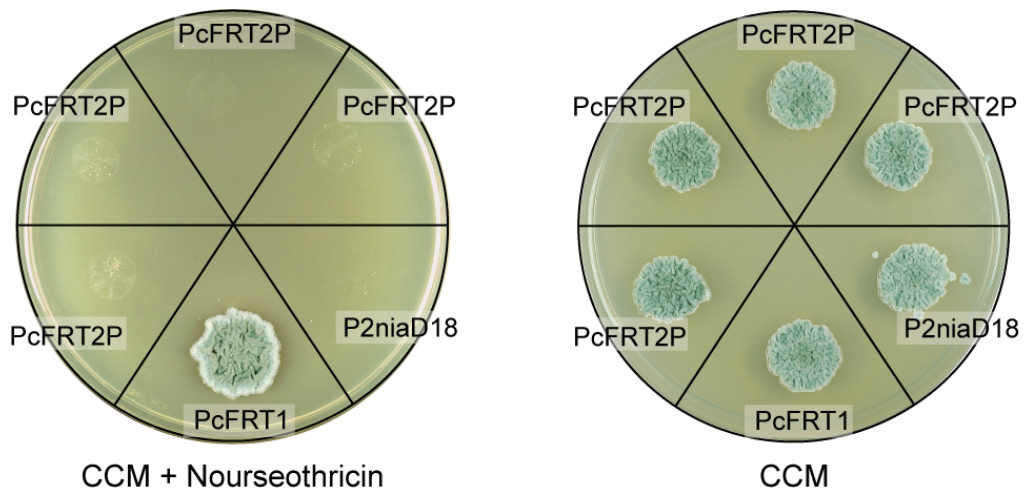

**Supplementary Fig. 2:** Growth tests on selective media of recombinant strains carrying the optimized FLP/*FRT* recombination system to select a marker-free PcFRT2P strain. All strains are given in Table 1.
