# Supplementary material
Source: PubMed Central journal article supplement (PMC2901726)
Supplement: supp_76_14_4664__3.pdf [file supp_76_14_4664__3.pdf]

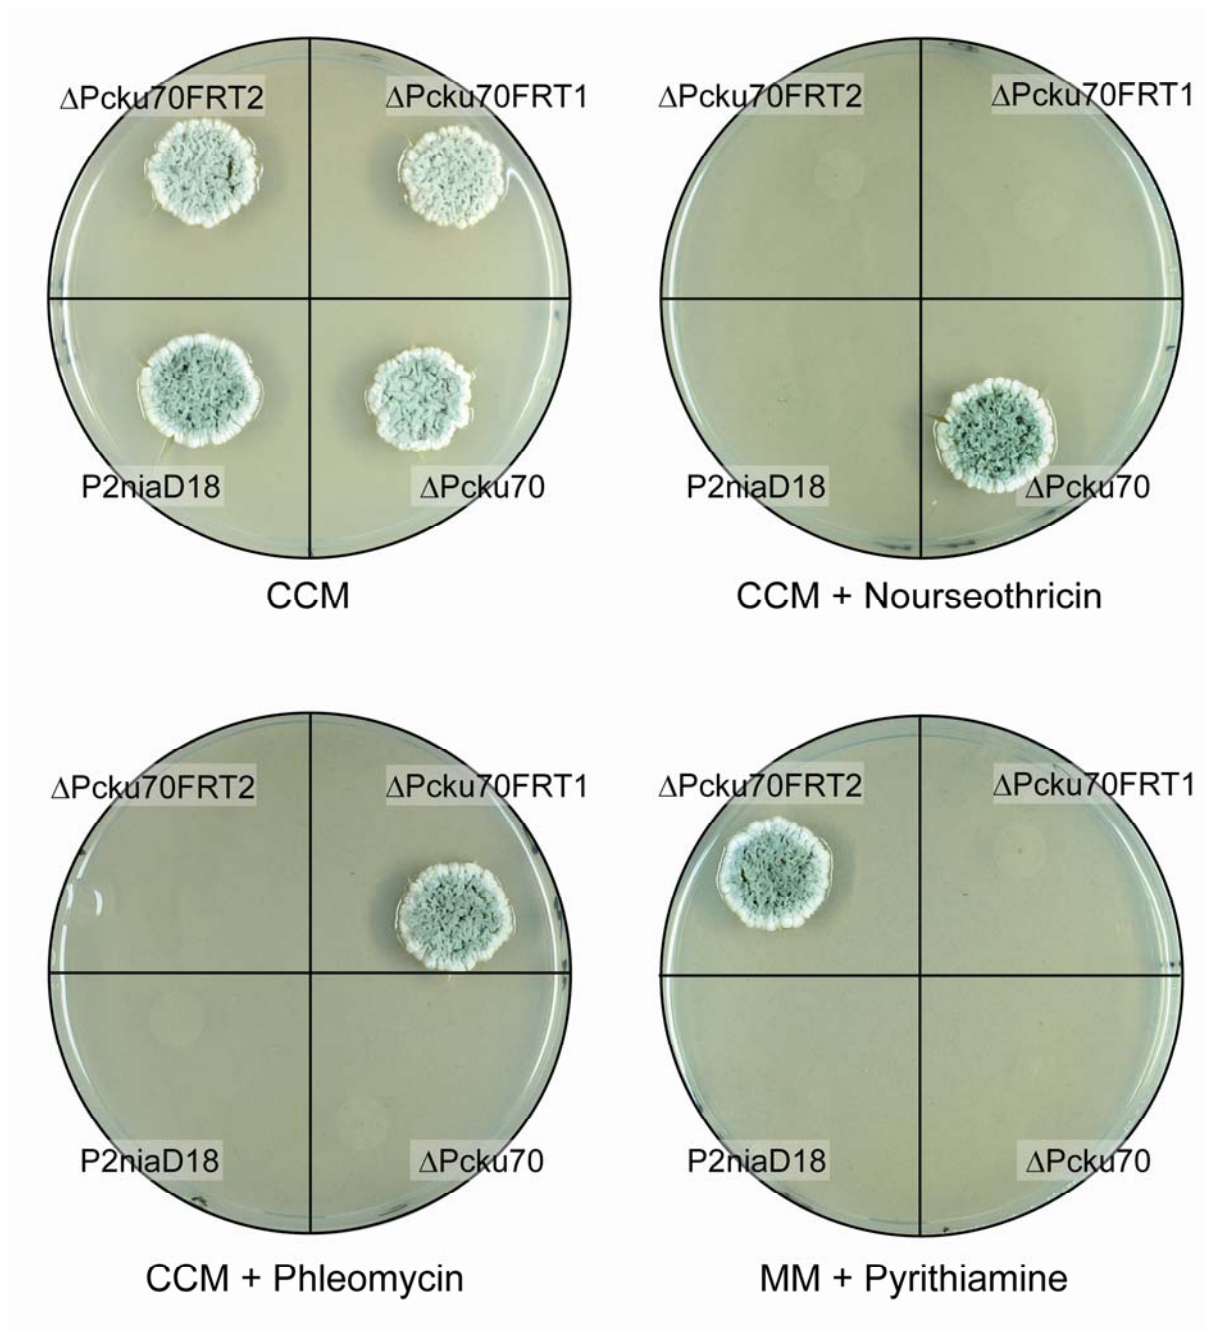

**Supplementary Fig. 3:** Growth tests on selective media of recombinant strains carrying the optimized *FLP/FRT* recombination system as a first step to constructing a marker-free  $\Delta Pcku70$  strain. All strains are given in Table 1.
